# Supplementary material for: Ab initio base-pairing energies of an oxidized thymine product, 5-formyluracil, with standard DNA bases at the BSSE-free DFT and MP2 theory levels
Source: Royal Society of Chemistry journal article supplement (doi:10.1039/b702755a), 2007-01-01
Supplement: b702755a.pdf [file b702755a.pdf]

Supplementary Material for Organic & Biomolecular Chemistry  
This journal is (c) The Royal Society of Chemistry 2007

Coordinates for uracil, 5-hydroxy-uracil and 5-formyl-uracil base-paired with standard DNA bases, determined at the BSSE-free MP2 theory level.

D. E. Volk, V. Thiviyathan, A. Somasunderam & D. G. Gorenstein, UTMB

```
TITLE      AFoU 1-methyl-adenine:1-methyl-5-hydroxy-uracil base pair
REMARK    6-311G(d,p)/MP2-BSSE Optimized Geometry
REMARK    Delta E = -13.5 kcal/mol
MODEL     1
ATOM      1 C1'   FOU      1      -4.383    2.827    0.000
ATOM      2 H1'1  FOU      1      -3.620    3.602   -0.004
ATOM      3 N1    FOU      1      -3.697    1.535   -0.000
ATOM      4 C6    FOU      1      -4.413    0.382    0.000
ATOM      5 H6    FOU      1      -5.496    0.482    0.000
ATOM      6 C5    FOU      1      -3.847   -0.857    0.000
ATOM      7 C7    FOU      1      -4.710   -2.057    0.001
ATOM      8 C4    FOU      1      -2.393   -0.969    0.000
ATOM      9 O4    FOU      1      -1.768   -2.026    0.001
ATOM     10 N3    FOU      1      -1.736    0.258    0.000
ATOM     11 H3    FOU      1      -0.696    0.230    0.000
ATOM     12 C2    FOU      1      -2.285    1.523   -0.000
ATOM     13 O2    FOU      1      -1.626    2.544    0.000
ATOM     14 H7    FOU      1      -4.163   -3.016    0.001
ATOM     15 O8    FOU      1      -5.929   -2.012    0.001
ATOM     16 H1'2  FOU      1      -5.007    2.918   -0.892
ATOM     17 H1'3  FOU      1      -4.999    2.922    0.897
TER
ATOM     18 C1'   ADE      2         6.170    1.332   -0.000
ATOM     19 H1'1  ADE      2         5.614    2.270   -0.001
ATOM     20 N9    ADE      2         5.190    0.257   -0.001
ATOM     21 C8    ADE      2         5.408   -1.097   -0.001
ATOM     22 H8    ADE      2         6.412   -1.503   -0.001
ATOM     23 N7    ADE      2         4.297   -1.825   -0.001
ATOM     24 C5    ADE      2         3.302   -0.875   -0.000
ATOM     25 C6    ADE      2         1.892   -0.982    0.000
ATOM     26 N6    ADE      2         1.263   -2.171   -0.000
ATOM     27 H61   ADE      2         0.249   -2.215    0.001
ATOM     28 H62   ADE      2         1.817   -3.010   -0.000
ATOM     29 N1    ADE      2         1.175    0.157    0.000
ATOM     30 C2    ADE      2         1.824    1.347    0.000
ATOM     31 H2    ADE      2         1.173    2.218    0.001
ATOM     32 N3    ADE      2         3.137    1.578   -0.000
ATOM     33 C4    ADE      2         3.824    0.423   -0.000
ATOM     34 H1'2  ADE      2         6.795    1.277   -0.894
ATOM     35 H1'3  ADE      2         6.794    1.277    0.894
ENDMDL
```

Supplementary Material for Organic & Biomolecular Chemistry  
This journal is (c) The Royal Society of Chemistry 2007

```
TITLE      A:5HodU   A:1-methyl-5-hydroxy-uracil base pair
REMARK    6-311G(d,p)/MP2-BSSE Optimized Geometry
REMARK    Delta E = -13.3 kcal/mol
REMARK    H-Bonds N1-H3=1.87 and H61-O4=2.04
MODEL
2
ATOM      1  C1'   HOU  A   1      -4.803  -2.466  -0.000
ATOM      2  H1'1  HOU  A   1      -4.099  -3.296  -0.000
ATOM      3  N1    HOU  A   1      -4.026  -1.232   0.000
ATOM      4  C6    HOU  A   1      -4.700  -0.019   0.001
ATOM      5  H6    HOU  A   1      -5.783  -0.069   0.002
ATOM      6  C5    HOU  A   1      -4.033   1.160   0.001
ATOM      7  O5    HOU  A   1      -4.640   2.370   0.002
ATOM      8  HO5   HOU  A   1      -3.899   2.996   0.002
ATOM      9  C4    HOU  A   1      -2.576   1.157   0.000
ATOM     10  O4    HOU  A   1      -1.939   2.218   0.000
ATOM     11  N3    HOU  A   1      -1.998  -0.085  -0.001
ATOM     12  H3    HOU  A   1      -0.959  -0.125  -0.001
ATOM     13  C2    HOU  A   1      -2.642  -1.322  -0.001
ATOM     14  O2    HOU  A   1      -2.024  -2.373  -0.002
ATOM     15  H1'2  HOU  A   1      -5.430  -2.516   0.894
ATOM     16  H1'3  HOU  A   1      -5.430  -2.516  -0.894
TER
ATOM     17  C1'   ADE  B   2       5.838  -1.556   0.002
ATOM     18  H1'1  ADE  B   2       5.235  -2.465   0.003
ATOM     19  N9    ADE  B   2       4.914  -0.433   0.001
ATOM     20  C8    ADE  B   2       5.201   0.909   0.001
ATOM     21  H8    ADE  B   2       6.224   1.264   0.002
ATOM     22  N7    ADE  B   2       4.128   1.693  -0.000
ATOM     23  C5    ADE  B   2       3.086   0.794  -0.001
ATOM     24  C6    ADE  B   2       1.683   0.972  -0.002
ATOM     25  N6    ADE  B   2       1.113   2.190  -0.003
ATOM     26  H61   ADE  B   2       0.104   2.286  -0.002
ATOM     27  H62   ADE  B   2       1.709   3.001  -0.001
ATOM     28  N1    ADE  B   2       0.910  -0.130  -0.002
ATOM     29  C2    ADE  B   2       1.497  -1.352  -0.001
ATOM     30  H2    ADE  B   2       0.803  -2.188  -0.001
ATOM     31  N3    ADE  B   2       2.797  -1.648   0.000
ATOM     32  C4    ADE  B   2       3.541  -0.529   0.000
ATOM     33  H1'2  ADE  B   2       6.465  -1.532   0.896
ATOM     34  H1'3  ADE  B   2       6.464  -1.534  -0.892
ENDMDL
```

Supplementary Material for Organic & Biomolecular Chemistry  
This journal is (c) The Royal Society of Chemistry 2007

```
TITLE      A:T WC  1-methyl-adenine:1-methyl-thymine base pair
REMARK    6-311G(d,p)/MP2-BSSE Optimized Geometry
REMARK    Delta E = -12.9 kcal/mol
REMARK    H-Bonds (A->T): H61-O4=2.01A; N1-H3=1.90A
MODEL
3
ATOM      1  C1'  THY      1      -4.781  -2.515   0.001
ATOM      2  H1'1  THY      1      -4.067  -3.336  -0.010
ATOM      3  N1    THY      1      -4.016  -1.272  -0.001
ATOM      4  C6    THY      1      -4.678  -0.065  -0.002
ATOM      5  H6    THY      1      -5.762  -0.140  -0.002
ATOM      6  C5    THY      1      -4.049   1.138  -0.002
ATOM      7  C7    THY      1      -4.768   2.453  -0.003
ATOM      8  H71   THY      1      -4.488   3.040  -0.882
ATOM      9  H72   THY      1      -4.489   3.041   0.876
ATOM     10  H73   THY      1      -5.852   2.308  -0.003
ATOM     11  C4    THY      1      -2.590   1.147  -0.001
ATOM     12  O4    THY      1      -1.911   2.174  -0.001
ATOM     13  N3    THY      1      -2.001  -0.110   0.000
ATOM     14  H3    THY      1      -0.964  -0.140   0.001
ATOM     15  C2    THY      1      -2.622  -1.346   0.001
ATOM     16  O2    THY      1      -2.007  -2.399   0.002
ATOM     17  H1'2  THY      1      -5.397  -2.578   0.902
ATOM     18  H1'3  THY      1      -5.416  -2.569  -0.886
TER
ATOM     19  C1'  ADE      2       5.880  -1.509  -0.003
ATOM     20  H1'1  ADE      2       5.288  -2.425  -0.004
ATOM     21  N9    ADE      2       4.943  -0.397  -0.002
ATOM     22  C8    ADE      2       5.213   0.947  -0.001
ATOM     23  H8    ADE      2       6.231   1.315  -0.002
ATOM     24  N7    ADE      2       4.130   1.718   0.001
ATOM     25  C5    ADE      2       3.100   0.806   0.001
ATOM     26  C6    ADE      2       1.694   0.966   0.002
ATOM     27  N6    ADE      2       1.106   2.175   0.005
ATOM     28  H61   ADE      2       0.094   2.253   0.003
ATOM     29  H62   ADE      2       1.690   2.995   0.002
ATOM     30  N1    ADE      2       0.935  -0.146   0.002
ATOM     31  C2    ADE      2       1.538  -1.359   0.001
ATOM     32  H2    ADE      2       0.855  -2.205   0.000
ATOM     33  N3    ADE      2       2.842  -1.639  -0.001
ATOM     34  C4    ADE      2       3.571  -0.512  -0.000
ATOM     35  H1'2  ADE      2       6.507  -1.480   0.891
ATOM     36  H1'3  ADE      2       6.507  -1.478  -0.897
ENDMDL
```

Supplementary Material for Organic & Biomolecular Chemistry  
This journal is (c) The Royal Society of Chemistry 2007

```
TITLE      A:U 1-methyl-adenine:1-methyl-5-hydroxy-uracil base pair
REMARK     6-311G(d,p)/MP2-BSSE Optimized Geometry
REMARK     Delta E = -12.9 kcal/mol
REMARK     H-Bonds (A->U): H61-O4=2.01A; N1-H3=1.90A
MODEL
4
ATOM       1  C1'  URA      1      -0.943  -1.944  -0.192  1.00  0.00
ATOM       2  N1   URA      1      -0.306  -0.637  -0.062  1.00  0.00
ATOM       3  C2   URA      1       1.066  -0.588   0.220  1.00  0.00
ATOM       4  O2   URA      1       1.749  -1.585   0.363  1.00  0.00
ATOM       5  N3   URA      1       1.567   0.696   0.323  1.00  0.00
ATOM       6  3H   URA      1       2.583   0.754   0.532  1.00  0.00
ATOM       7  C4   URA      1       0.891   1.906   0.181  1.00  0.00
ATOM       8  O4   URA      1       1.474   2.980   0.300  1.00  0.00
ATOM       9  C5   URA      1      -0.525   1.751  -0.110  1.00  0.00
ATOM      10  5H   URA      1      -1.135   2.635  -0.237  1.00  0.00
ATOM      11  C6   URA      1      -1.049   0.505  -0.217  1.00  0.00
ATOM      12  6H   URA      1      -2.102   0.341  -0.433  1.00  0.00
ATOM      13  1H1' URA      1      -0.175  -2.698  -0.031  1.00  0.00
ATOM      14  2H1' URA      1      -1.730  -2.057   0.558  1.00  0.00
ATOM      15  3H1' URA      1      -1.366  -2.060  -1.194  1.00  0.00
TER
ATOM       1  C1'  ADE      2       9.366  -0.062   1.939  1.00  0.00
ATOM       2  N9   ADE      2       8.364   0.971   1.730  1.00  0.00
ATOM       3  C4   ADE      2       7.035   0.748   1.455  1.00  0.00
ATOM       4  N3   ADE      2       6.411  -0.435   1.327  1.00  0.00
ATOM       5  C2   ADE      2       5.116  -0.260   1.058  1.00  0.00
ATOM       6  2H   ADE      2       4.516  -1.158   0.935  1.00  0.00
ATOM       7  N1   ADE      2       4.433   0.902   0.915  1.00  0.00
ATOM       8  C6   ADE      2       5.087   2.070   1.048  1.00  0.00
ATOM       9  N6   ADE      2       4.421   3.229   0.907  1.00  0.00
ATOM      10  1H6   ADE      2       3.426   3.227   0.703  1.00  0.00
ATOM      11  2H6   ADE      2       4.927   4.093   1.012  1.00  0.00
ATOM      12  C5   ADE      2       6.472   2.023   1.336  1.00  0.00
ATOM      13  N7   ADE      2       7.407   3.014   1.527  1.00  0.00
ATOM      14  C8   ADE      2       8.524   2.333   1.761  1.00  0.00
ATOM      15  8H   ADE      2       9.489   2.782   1.960  1.00  0.00
ATOM      16  1H1' ADE      2       8.860  -1.023   1.836  1.00  0.00
ATOM      17  2H1' ADE      2       9.795   0.019   2.941  1.00  0.00
ATOM      18  3H1' ADE      2      10.158   0.015   1.190  1.00  0.00
TER
ENDMDL
```

Supplementary Material for Organic & Biomolecular Chemistry  
This journal is (c) The Royal Society of Chemistry 2007

```
TITLE      C:FoU(1)  1-methyl-cytosine:1-methyl-5-formyl-uracil
REMARK    6-311G(d,p)/MP2-BSSE Optimized Geometry
REMARK    Delta E = -13.1 kcal/mol
REMARK    H-bonds  H41-O4=1.98A; N3-H3=1.97A
MODEL
5
ATOM      1  C1'  FOU      1      3.490   2.885  -0.538
ATOM      2  H1'1 FOU      1      3.072   3.610   0.163
ATOM      3  N1   FOU      1      2.923   1.563  -0.279
ATOM      4  C6   FOU      1      3.696   0.491   0.008
ATOM      5  H6   FOU      1      4.769   0.653   0.055
ATOM      6  C5   FOU      1      3.188  -0.756   0.230
ATOM      7  C7   FOU      1      4.104  -1.873   0.528
ATOM      8  H7   FOU      1      3.605  -2.844   0.691
ATOM      9  O8   FOU      1      5.317  -1.756   0.595
ATOM     10  C4   FOU      1      1.747  -0.960   0.158
ATOM     11  O4   FOU      1      1.186  -2.043   0.304
ATOM     12  N3   FOU      1      1.022   0.202  -0.098
ATOM     13  H3   FOU      1     -0.010   0.111  -0.082
ATOM     14  C2   FOU      1      1.515   1.465  -0.369
ATOM     15  O2   FOU      1      0.840   2.428  -0.661
ATOM     16  H1'2 FOU      1      3.248   3.203  -1.553
ATOM     17  H1'3 FOU      1      4.571   2.821  -0.412
TER
ATOM     18  C1'  CYT      2     -4.995   1.584   0.649
ATOM     19  H1'1 CYT      2     -4.873   1.777   1.717
ATOM     20  N1   CYT      2     -4.141   0.474   0.243
ATOM     21  C2   CYT      2     -2.740   0.660   0.424
ATOM     22  O2   CYT      2     -2.347   1.705   0.914
ATOM     23  N3   CYT      2     -1.918  -0.371   0.024
ATOM     24  C4   CYT      2     -2.426  -1.502  -0.436
ATOM     25  N4   CYT      2     -1.554  -2.474  -0.815
ATOM     26  C5   CYT      2     -3.835  -1.714  -0.601
ATOM     27  H5   CYT      2     -4.238  -2.638  -0.995
ATOM     28  C6   CYT      2     -4.651  -0.681  -0.247
ATOM     29  H6   CYT      2     -5.732  -0.732  -0.337
ATOM     30  H41  CYT      2     -1.920  -3.407  -0.917
ATOM     31  H42  CYT      2     -0.608  -2.395  -0.447
ATOM     32  H1'2 CYT      2     -6.031   1.325   0.429
ATOM     33  H1'3 CYT      2     -4.708   2.486   0.106
ENDMDL
```

Supplementary Material for Organic & Biomolecular Chemistry  
This journal is (c) The Royal Society of Chemistry 2007

```
TITLE      C:FOU(2) 1-methyl-cytosine:1-methyl-5-formyl-uracil
REMARK     6-311G(d,p)/MP2-BSSE Optimized Geometry
REMARK     Delta E = - 13.1 kcal/mol
REMARK     H-Bonds H41-O4=1.98A; N3-H3=1.97A
MODEL
6
ATOM       1 C1'   FOU      1      -3.488    2.885   -0.539
ATOM       2 H1'1  FOU      1      -3.071    3.610    0.162
ATOM       3 N1    FOU      1      -2.921    1.564   -0.280
ATOM       4 C6    FOU      1      -3.695    0.492    0.007
ATOM       5 H6    FOU      1      -4.769    0.655    0.053
ATOM       6 C5    FOU      1      -3.189   -0.755    0.230
ATOM       7 C7    FOU      1      -4.105   -1.872    0.528
ATOM       8 H7    FOU      1      -3.607   -2.843    0.691
ATOM       9 O8    FOU      1      -5.319   -1.754    0.593
ATOM      10 C4    FOU      1      -1.747   -0.960    0.158
ATOM      11 O4    FOU      1      -1.187   -2.044    0.305
ATOM      12 N3    FOU      1      -1.021    0.201   -0.096
ATOM      13 H3    FOU      1       0.010    0.110   -0.078
ATOM      14 C2    FOU      1      -1.513    1.464   -0.368
ATOM      15 O2    FOU      1      -0.837    2.427   -0.660
ATOM      16 H1'2  FOU      1      -4.569    2.822   -0.415
ATOM      17 H1'3  FOU      1      -3.244    3.204   -1.554
TER
ATOM      18 C1'   CYT      2       4.994    1.585    0.648
ATOM      19 H1'1  CYT      2       4.707    2.487    0.105
ATOM      20 N1    CYT      2       4.140    0.475    0.242
ATOM      21 C2    CYT      2       2.739    0.659    0.424
ATOM      22 O2    CYT      2       2.346    1.704    0.915
ATOM      23 N3    CYT      2       1.917   -0.372    0.025
ATOM      24 C4    CYT      2       2.426   -1.503   -0.436
ATOM      25 N4    CYT      2       1.554   -2.475   -0.814
ATOM      26 C5    CYT      2       3.835   -1.714   -0.601
ATOM      27 H5    CYT      2       4.239   -2.637   -0.995
ATOM      28 C6    CYT      2       4.650   -0.680   -0.248
ATOM      29 H6    CYT      2       5.731   -0.731   -0.338
ATOM      30 H42   CYT      2       1.920   -3.408   -0.917
ATOM      31 H41   CYT      2       0.608   -2.396   -0.446
ATOM      32 H1'2  CYT      2       6.030    1.325    0.429
ATOM      33 H1'3  CYT      2       4.871    1.778    1.716
ENDMDL
```

Supplementary Material for Organic & Biomolecular Chemistry  
This journal is (c) The Royal Society of Chemistry 2007

```
TITLE      C(1):5-HoDU  1-methyl-cytosine:1-methyl-5-hydroxy-uracil  BP
REMARK    6-311G(d,p)/MP2-BSSE Optimized Geometry
REMARK    Delta E = -12.2 kcal/mol
REMARK    H-Bonds (C->U): H41-O4=1.99A; N3-H3=1.99A
MODEL
7
ATOM      1  C1'  HOU      1      -3.981  -2.488  -0.540
ATOM      2  H1'1 HOU      1      -3.487  -3.326  -0.047
ATOM      3  N1   HOU      1      -3.284  -1.252  -0.200
ATOM      4  C6   HOU      1      -3.994  -0.101   0.098
ATOM      5  H6   HOU      1      -5.074  -0.189   0.140
ATOM      6  C5   HOU      1      -3.357   1.072   0.331
ATOM      7  O5   HOU      1      -3.997   2.230   0.629
ATOM      8  HO5  HOU      1      -3.271   2.863   0.741
ATOM      9  C4   HOU      1      -1.904   1.128   0.265
ATOM     10  O4   HOU      1      -1.307   2.196   0.459
ATOM     11  N3   HOU      1      -1.284  -0.062  -0.016
ATOM     12  H3   HOU      1      -0.250  -0.060  -0.014
ATOM     13  C2   HOU      1      -1.902  -1.278  -0.321
ATOM     14  O2   HOU      1      -1.288  -2.272  -0.661
ATOM     15  H1'2 HOU      1      -3.965  -2.662  -1.619
ATOM     16  H1'3 HOU      1      -5.012  -2.408  -0.193
TER
ATOM     17  C1'  CYT      2       4.663  -1.838   0.516
ATOM     18  H1'1 CYT      2       4.583  -2.034   1.587
ATOM     19  N1   CYT      2       3.866  -0.668   0.164
ATOM     20  C2   CYT      2       2.466  -0.762   0.415
ATOM     21  O2   CYT      2       2.031  -1.784   0.918
ATOM     22  N3   CYT      2       1.696   0.324   0.064
ATOM     23  C4   CYT      2       2.255   1.425  -0.411
ATOM     24  N4   CYT      2       1.432   2.456  -0.740
ATOM     25  C5   CYT      2       3.665   1.546  -0.643
ATOM     26  H5   CYT      2       4.109   2.445  -1.049
ATOM     27  C6   CYT      2       4.427   0.457  -0.341
ATOM     28  H6   CYT      2       5.503   0.438  -0.484
ATOM     29  H42  CYT      2       1.854   3.364  -0.850
ATOM     30  H41  CYT      2       0.501   2.436  -0.328
ATOM     31  H1'2 CYT      2       5.702  -1.645   0.244
ATOM     32  H1'3 CYT      2       4.288  -2.712  -0.018
ENDMDL
```

Supplementary Material for Organic & Biomolecular Chemistry  
This journal is (c) The Royal Society of Chemistry 2007

```
TITLE      C(2):5-HoDU  1-methyl-cytosine:1-methyl-5-hydroxy-uracil  BP
REMARK    6-311G(d,p)/MP2-BSSE Optimized Geometry
REMARK    Delta E = -12.2 kcal/mol
REMARK    H-Bonds (C->U): H41-O4=1.99A; N3-H3=1.99A
MODEL
      8
ATOM      1  C1'  HOU      1      3.984  -2.486  -0.539
ATOM      2  H1'1 HOU      1      3.479  -3.327  -0.062
ATOM      3  N1   HOU      1      3.285  -1.252  -0.198
ATOM      4  C6   HOU      1      3.994  -0.101   0.101
ATOM      5  H6   HOU      1      5.073  -0.188   0.145
ATOM      6  C5   HOU      1      3.356   1.073   0.333
ATOM      7  O7   HOU      1      3.995   2.230   0.631
ATOM      8  H7   HOU      1      3.269   2.863   0.743
ATOM      9  C4   HOU      1      1.903   1.128   0.265
ATOM     10  O4   HOU      1      1.306   2.195   0.458
ATOM     11  H1'2 HOU      1      5.009  -2.413  -0.175
ATOM     12  H1'3 HOU      1      3.985  -2.650  -1.620
ATOM     13  N3   HOU      1      1.284  -0.062  -0.018
ATOM     14  H3   HOU      1      0.250  -0.060  -0.018
ATOM     15  C2   HOU      1      1.903  -1.278  -0.322
ATOM     16  O2   HOU      1      1.290  -2.271  -0.665
TER
ATOM     17  C1'  CYT      2     -4.662  -1.839   0.519
ATOM     18  H1'1 CYT      2     -4.287  -2.713  -0.015
ATOM     19  N1   CYT      2     -3.866  -0.669   0.165
ATOM     20  C2   CYT      2     -2.466  -0.763   0.414
ATOM     21  O2   CYT      2     -2.029  -1.785   0.916
ATOM     22  N3   CYT      2     -1.696   0.324   0.062
ATOM     23  C4   CYT      2     -2.256   1.424  -0.412
ATOM     24  N4   CYT      2     -1.434   2.456  -0.743
ATOM     25  C5   CYT      2     -3.667   1.545  -0.641
ATOM     26  H5   CYT      2     -4.112   2.445  -1.046
ATOM     27  C6   CYT      2     -4.428   0.456  -0.338
ATOM     28  H6   CYT      2     -5.505   0.437  -0.479
ATOM     29  H42  CYT      2     -1.856   3.364  -0.851
ATOM     30  H41  CYT      2     -0.503   2.435  -0.332
ATOM     31  H1'2 CYT      2     -5.701  -1.647   0.248
ATOM     32  H1'3 CYT      2     -4.581  -2.035   1.590
ENDMDL
```



Supplementary Material for Organic & Biomolecular Chemistry  
This journal is (c) The Royal Society of Chemistry 2007

```
TITLE      C(1):U 1-methyl-cytosine:1-methyl-uracil base pair
REMARK    6-311G(d,p)/MP2-BSSE Optimized Geometry
REMARK    Delta E = -12.0 kcal/mol
REMARK    H-Bonds (C->U): H41-O4=1.95A; N3-H3=2.01A
MODEL
  9
ATOM      1 C1'  URA      1      -4.423  -1.957  -0.488
ATOM      2 H1'  URA      1      -4.107  -2.804   0.124
ATOM      3 N1   URA      1      -3.632  -0.778  -0.153
ATOM      4 C6   URA      1      -4.211   0.399   0.238
ATOM      5 H6   URA      1      -5.294   0.383   0.306
ATOM      6 C5   URA      1      -3.488   1.511   0.521
ATOM      7 H5   URA      1      -3.964   2.433   0.822
ATOM      8 C4   URA      1      -2.040   1.475   0.408
ATOM      9 O4   URA      1      -1.298   2.434   0.608
ATOM     10 N3   URA      1      -1.532   0.230   0.043
ATOM     11 H3   URA      1      -0.503   0.142   0.019
ATOM     12 C2   URA      1      -2.242  -0.911  -0.292
ATOM     13 O2   URA      1      -1.739  -1.949  -0.674
ATOM     14 H1'2 URA      1      -4.285  -2.222  -1.538
ATOM     15 H1'3 URA      1      -5.472  -1.731  -0.296
TER
ATOM     16 C1'  CYT      2       4.285  -2.103   0.379
ATOM     17 H1'1 CYT      2       4.188  -2.359   1.436
ATOM     18 N1   CYT      2       3.585  -0.853   0.103
ATOM     19 C2   CYT      2       2.182  -0.849   0.353
ATOM     20 O2   CYT      2       1.666  -1.863   0.791
ATOM     21 N3   CYT      2       1.502   0.316   0.076
ATOM     22 C4   CYT      2       2.149   1.395  -0.334
ATOM     23 N4   CYT      2       1.414   2.507  -0.594
ATOM     24 C5   CYT      2       3.566   1.415  -0.564
ATOM     25 H5   CYT      2       4.081   2.299  -0.916
ATOM     26 C6   CYT      2       4.236   0.252  -0.333
ATOM     27 H6   CYT      2       5.308   0.154  -0.482
ATOM     28 H42  CYT      2       1.908   3.383  -0.651
ATOM     29 H41  CYT      2       0.482   2.536  -0.183
ATOM     30 H1'2 CYT      2       5.336  -1.978   0.116
ATOM     31 H1'3 CYT      2       3.842  -2.909  -0.208
ENDMDL
```

Supplementary Material for Organic & Biomolecular Chemistry  
This journal is (c) The Royal Society of Chemistry 2007

```
TITLE      C(2):U 1-methyl-cytosine:1-methyl-uracil base pair
REMARK     6-311G(d,p)/MP2-BSSE Optimized Geometry
REMARK     Delta E = -12.0 kcal/mol
REMARK     H-Bonds (C->U): H41-O4=1.95A; N3-H3=2.02A
MODEL
ATOM       1  C1'  URA      1      4.425  -1.956  -0.482
ATOM       2  H1'1 URA      1      4.103  -2.804   0.123
ATOM       3  N1   URA      1      3.633  -0.777  -0.149
ATOM       4  C6   URA      1      4.211   0.400   0.243
ATOM       5  H6   URA      1      5.294   0.385   0.314
ATOM       6  C5   URA      1      3.487   1.512   0.522
ATOM       7  H5   URA      1      3.962   2.435   0.825
ATOM       8  C4   URA      1      2.039   1.476   0.405
ATOM       9  O4   URA      1      1.296   2.435   0.602
ATOM      10  H1'2 URA      1      5.473  -1.732  -0.281
ATOM      11  H1'3 URA      1      4.297  -2.215  -1.535
ATOM      12  N3   URA      1      1.532   0.230   0.039
ATOM      13  H3   URA      1      0.504   0.143   0.011
ATOM      14  C2   URA      1      2.244  -0.910  -0.294
ATOM      15  O2   URA      1      1.743  -1.948  -0.679
TER
ATOM      16  C1'  CYT      2     -4.282  -2.106   0.381
ATOM      17  H1'1 CYT      2     -3.841  -2.910  -0.209
ATOM      18  N1   CYT      2     -3.585  -0.855   0.104
ATOM      19  C2   CYT      2     -2.180  -0.851   0.349
ATOM      20  O2   CYT      2     -1.662  -1.866   0.784
ATOM      21  N3   CYT      2     -1.503   0.315   0.072
ATOM      22  C4   CYT      2     -2.152   1.395  -0.333
ATOM      23  N4   CYT      2     -1.419   2.508  -0.594
ATOM      24  C5   CYT      2     -3.569   1.414  -0.558
ATOM      25  H5   CYT      2     -4.087   2.299  -0.906
ATOM      26  C6   CYT      2     -4.239   0.250  -0.327
ATOM      27  H6   CYT      2     -5.311   0.152  -0.472
ATOM      28  H42  CYT      2     -1.914   3.383  -0.647
ATOM      29  H41  CYT      2     -0.485   2.538  -0.185
ATOM      30  H1'2 CYT      2     -5.335  -1.981   0.122
ATOM      31  H1'3 CYT      2     -4.181  -2.364   1.437
ENDMDL
```

Supplementary Material for Organic & Biomolecular Chemistry  
This journal is (c) The Royal Society of Chemistry 2007

```
TITLE      G:C   1-methyl-guanine:1-methyl-cytosine BP
REMARK     6-311G(d,p)/MP2-BSSE Optimized Geometry
REMARK     Delta E = -24.9 kcal/mol
REMARK     H-Bonds (G->C) O6-H41=1.86A; H1-N3=1.98A; H21-O2=2.01A
MODEL
11
ATOM       1  C1'   CYT    1      -5.159  -1.905   0.335
ATOM       2  H1'1  CYT    1      -4.979  -2.572  -0.510
ATOM       3  N1    CYT    1      -4.388  -0.677   0.168
ATOM       4  C2    CYT    1      -2.985  -0.815   0.064
ATOM       5  O2    CYT    1      -2.505  -1.946   0.127
ATOM       6  N3    CYT    1      -2.241   0.319  -0.097
ATOM       7  C4    CYT    1      -2.820   1.516  -0.135
ATOM       8  N4    CYT    1      -2.031   2.590  -0.320
ATOM       9  C5    CYT    1      -4.243   1.678  -0.028
ATOM      10  H5    CYT    1      -4.717   2.651  -0.068
ATOM      11  C6    CYT    1      -4.981   0.544   0.122
ATOM      12  H6    CYT    1      -6.063   0.557   0.211
ATOM      13  H42   CYT    1      -2.421   3.506  -0.176
ATOM      14  H41   CYT    1      -1.017   2.476  -0.220
ATOM      15  H1'2  CYT    1      -6.216  -1.645   0.390
ATOM      16  H1'3  CYT    1      -4.849  -2.416   1.248
TER
ATOM      17  C1'   GUA    2       5.562  -1.450   0.127
ATOM      18  H1'1  GUA    2       5.186  -2.206  -0.562
ATOM      19  N9    GUA    2       4.654  -0.318   0.109
ATOM      20  C8    GUA    2       4.954   1.018   0.256
ATOM      21  H8    GUA    2       5.977   1.353   0.364
ATOM      22  N7    GUA    2       3.889   1.806   0.238
ATOM      23  C5    GUA    2       2.842   0.927   0.077
ATOM      24  C6    GUA    2       1.427   1.166  -0.017
ATOM      25  O6    GUA    2       0.813   2.230   0.031
ATOM      26  N1    GUA    2       0.736  -0.052  -0.187
ATOM      27  C2    GUA    2       1.292  -1.305  -0.257
ATOM      28  N2    GUA    2       0.425  -2.332  -0.508
ATOM      29  N3    GUA    2       2.584  -1.543  -0.165
ATOM      30  C4    GUA    2       3.290  -0.394  -0.004
ATOM      31  H1    GUA    2      -0.289   0.034  -0.223
ATOM      32  H22   GUA    2       0.827  -3.237  -0.317
ATOM      33  H21   GUA    2      -0.549  -2.215  -0.237
ATOM      34  H1'2  GUA    2       6.550  -1.116  -0.193
ATOM      35  H1'3  GUA    2       5.626  -1.881   1.130
TER
ENDMDL
```

Supplementary Material for Organic & Biomolecular Chemistry  
This journal is (c) The Royal Society of Chemistry 2007

```
TITLE      G:5HodU  1-methyl-guanine:1-methyl-5-hydroxy-uracil BP
REMARK    6-311G(d,p)/MP2-BSSE Optimized Geometry
REMARK    Delta E = -14.9 kcal/mol
REMARK    H-Bonds (G->U) O6-H3=1.88 and H1-O2=1.86A
MODEL
12
ATOM      1  C1'  HOU      1      3.908   2.749   0.073
ATOM      2  H1'1 HOU      1      3.350   3.211  -0.742
ATOM      3  N1   HOU      1      3.743   1.299   0.027
ATOM      4  C6   HOU      1      4.851   0.457   0.030
ATOM      5  H6   HOU      1      5.824   0.931   0.045
ATOM      6  C5   HOU      1      4.699  -0.888   0.007
ATOM      7  O5   HOU      1      5.732  -1.759   0.003
ATOM      8  HO5  HOU      1      5.297  -2.628  -0.016
ATOM      9  C4   HOU      1      3.359  -1.474  -0.016
ATOM     10  O4   HOU      1      3.196  -2.689  -0.039
ATOM     11  N3   HOU      1      2.328  -0.549  -0.010
ATOM     12  H3   HOU      1      1.364  -0.916  -0.021
ATOM     13  C2   HOU      1      2.454   0.828   0.019
ATOM     14  O2   HOU      1      1.485   1.591   0.037
ATOM     15  H1'2 HOU      1      4.969   2.974  -0.031
ATOM     16  H1'3 HOU      1      3.537   3.147   1.020
TER
ATOM     17  C1'  GUA      2     -6.258   0.148   0.088
ATOM     18  H1'1 GUA      2     -6.191   1.052  -0.519
ATOM     19  N9   GUA      2     -4.983  -0.545   0.026
ATOM     20  C8   GUA      2     -4.752  -1.902   0.042
ATOM     21  H8   GUA      2     -5.571  -2.609   0.063
ATOM     22  N7   GUA      2     -3.466  -2.221   0.021
ATOM     23  C5   GUA      2     -2.832  -1.003  -0.006
ATOM     24  C6   GUA      2     -1.430  -0.679  -0.038
ATOM     25  O6   GUA      2     -0.451  -1.419  -0.038
ATOM     26  N1   GUA      2     -1.261   0.723  -0.075
ATOM     27  C2   GUA      2     -2.251   1.668  -0.059
ATOM     28  N2   GUA      2     -1.826   2.977  -0.168
ATOM     29  N3   GUA      2     -3.533   1.396  -0.017
ATOM     30  C4   GUA      2     -3.751   0.052  -0.002
ATOM     31  H1   GUA      2     -0.285   1.038  -0.097
ATOM     32  H42  GUA      2     -2.540   3.633   0.116
ATOM     33  H41  GUA      2     -0.913   3.169   0.222
ATOM     34  H1'2 GUA      2     -7.035  -0.506  -0.309
ATOM     35  H1'3 GUA      2     -6.499   0.424   1.118
TER
ENDMDL
```

Supplementary Material for Organic & Biomolecular Chemistry  
This journal is (c) The Royal Society of Chemistry 2007

```
TITLE      G:5HodC   1-methyl-guanine:1-methyl-5-hydroxy-cytosine BP
REMARK    6-311G(d,p)/MP2-BSSE Optimized Geometry
REMARK    Delta E = -24.7 kcal/mol
REMARK    H-Bonds 1.87, 1.97 and 2.01 angstrom
MODEL
13
ATOM      1  C1'   HOC      1      -4.756   2.382   0.422
ATOM      2  H1'1  HOC      1      -4.375   2.862   1.326
ATOM      3  N1    HOC      1      -4.070   1.111   0.210
ATOM      4  C2    HOC      1      -2.674   1.164   0.048
ATOM      5  O2    HOC      1      -2.115   2.260   0.082
ATOM      6  N3    HOC      1      -2.006  -0.022  -0.123
ATOM      7  C4    HOC      1      -2.655  -1.176  -0.128
ATOM      8  N7    HOC      1      -1.969  -2.327  -0.303
ATOM      9  C5    HOC      1      -4.088  -1.241  -0.022
ATOM     10  C6    HOC      1      -4.753  -0.068   0.158
ATOM     11  H6    HOC      1      -5.831  -0.036   0.270
ATOM     12  H71   HOC      1      -2.428  -3.165   0.021
ATOM     13  H72   HOC      1      -0.949  -2.286  -0.201
ATOM     14  H1'2  HOC      1      -5.825   2.187   0.523
ATOM     15  H1'3  HOC      1      -4.572   3.047  -0.423
ATOM     16  O8    HOC      1      -4.749  -2.452  -0.023
ATOM     17  HO8   HOC      1      -4.625  -2.832  -0.899
TER
ATOM     18  C1'   GUA      2       5.906   1.182   0.103
ATOM     19  H1'1  GUA      2       5.374   2.119  -0.064
ATOM     20  N9    GUA      2       4.912   0.124   0.134
ATOM     21  C8    GUA      2       5.112  -1.228   0.297
ATOM     22  H8    GUA      2       6.106  -1.637   0.427
ATOM     23  N7    GUA      2       3.992  -1.936   0.277
ATOM     24  C5    GUA      2       3.014  -0.987   0.090
ATOM     25  C6    GUA      2       1.587  -1.124  -0.012
ATOM     26  O6    GUA      2       0.897  -2.141   0.046
ATOM     27  N1    GUA      2       0.987   0.137  -0.205
ATOM     28  C2    GUA      2       1.632   1.347  -0.285
ATOM     29  N2    GUA      2       0.843   2.430  -0.557
ATOM     30  N3    GUA      2       2.937   1.490  -0.185
ATOM     31  C4    GUA      2       3.558   0.297  -0.002
ATOM     32  H1    GUA      2      -0.041   0.125  -0.249
ATOM     33  H21   GUA      2       1.307   3.306  -0.374
ATOM     34  H22   GUA      2      -0.139   2.387  -0.293
ATOM     35  H1'2  GUA      2       6.442   1.231   1.054
ATOM     36  H1'3  GUA      2       6.615   1.015  -0.712
ENDMDL
```

Supplementary Material for Organic & Biomolecular Chemistry  
This journal is (c) The Royal Society of Chemistry 2007

```
TITLE      G:U   1-methyl-guanine:1-methyl-uracil base pair
REMARK     6-311G(d,p)/MP2-BSSE Optimized Geometry
REMARK     Delta E = -13.4 kcal/mol
REMARK     H-Bonds (G->U) O6-H3=1.94A and H1-O2=1.87A
MODEL
ATOM       1  C1'   URA      1      4.348   2.408   0.069
ATOM       2  H1'1  URA      1      3.880   2.882  -0.796
ATOM       3  N1    URA      1      4.119   0.967   0.037
ATOM       4  C6    URA      1      5.161   0.066   0.021
ATOM       5  H6    URA      1      6.152   0.508   0.032
ATOM       6  C5    URA      1      4.965  -1.272  -0.008
ATOM       7  H5    URA      1      5.799  -1.962  -0.021
ATOM       8  C4    URA      1      3.611  -1.816  -0.022
ATOM       9  O4    URA      1      3.316  -2.995  -0.048
ATOM      10  N3    URA      1      2.617  -0.813  -0.002
ATOM      11  H3    URA      1      1.640  -1.135  -0.010
ATOM      12  C2    URA      1      2.797   0.546   0.028
ATOM      13  O2    URA      1      1.879   1.366   0.047
ATOM      14  H1'2  URA      1      5.424   2.582   0.048
ATOM      15  H1'3  URA      1      3.922   2.840   0.977
TER
ATOM      16  C1'   GUA      2     -5.952   0.420   0.075
ATOM      17  H1'1  GUA      2     -5.824   1.318  -0.530
ATOM      18  N9    GUA      2     -4.725  -0.355   0.020
ATOM      19  C8    GUA      2     -4.582  -1.723   0.042
ATOM      20  H8    GUA      2     -5.445  -2.376   0.061
ATOM      21  N7    GUA      2     -3.320  -2.125   0.027
ATOM      22  C5    GUA      2     -2.608  -0.950  -0.001
ATOM      23  C6    GUA      2     -1.186  -0.719  -0.029
ATOM      24  O6    GUA      2     -0.257  -1.518  -0.023
ATOM      25  N1    GUA      2     -0.928   0.672  -0.069
ATOM      26  C2    GUA      2     -1.856   1.677  -0.060
ATOM      27  N2    GUA      2     -1.348   2.957  -0.171
ATOM      28  N3    GUA      2     -3.153   1.489  -0.023
ATOM      29  C4    GUA      2     -3.457   0.161  -0.004
ATOM      30  H1    GUA      2      0.065   0.922  -0.090
ATOM      31  H21   GUA      2     -2.021   3.656   0.107
ATOM      32  H22   GUA      2     -0.429   3.091   0.228
ATOM      33  H1'2  GUA      2     -6.768  -0.182  -0.326
ATOM      34  H1'3  GUA      2     -6.181   0.711   1.104
ENDMDL
```

Supplementary Material for Organic & Biomolecular Chemistry  
This journal is (c) The Royal Society of Chemistry 2007

```
TITLE      T:FOU(conformation 1) 1-methyl-thymine:1-methyl-5-formyl uracil
REMARK     6-311G(d,p)/MP2-BSSE Optimized Geometry
REMARK     Delta E = -10.3 kcal/mol
REMARK     H-bonds (T > FoU) = O4-H3=1.91A,H3-O2=1.97A
MODEL
ATOM       1  C1'   FOU      1      5.189  -1.848   0.000
ATOM       2  H1'1  FOU      1      4.838  -2.877  -0.002
ATOM       3  N1    FOU      1      4.011  -0.980  -0.000
ATOM       4  C6    FOU      1      4.158   0.369  -0.000
ATOM       5  H6    FOU      1      5.178   0.747  -0.000
ATOM       6  C5    FOU      1      3.113   1.244  -0.000
ATOM       7  C7    FOU      1      3.374   2.699  -0.000
ATOM       8  H7    FOU      1      2.468   3.329  -0.000
ATOM       9  O8    FOU      1      4.494   3.181  -0.001
ATOM      10  C4    FOU      1      1.753   0.719  -0.000
ATOM      11  O4    FOU      1      0.735   1.402  -0.000
ATOM      12  N3    FOU      1      1.692  -0.674  -0.000
ATOM      13  H3    FOU      1      0.751  -1.084  -0.000
ATOM      14  C2    FOU      1      2.734  -1.583  -0.000
ATOM      15  O2    FOU      1      2.580  -2.787   0.000
ATOM      16  H1'2  FOU      1      5.786  -1.664   0.896
ATOM      17  H1'3  FOU      1      5.789  -1.661  -0.893
TER
ATOM      18  C1'   THY      2     -3.510  -2.911   0.000
ATOM      19  H1'1  THY      2     -2.504  -3.327   0.001
ATOM      20  N1    THY      2     -3.387  -1.457   0.000
ATOM      21  C2    THY      2     -2.122  -0.891   0.000
ATOM      22  O2    THY      2     -1.096  -1.564   0.000
ATOM      23  N3    THY      2     -2.119   0.486   0.000
ATOM      24  H3    THY      2     -1.189   0.914   0.000
ATOM      25  C4    THY      2     -3.218   1.358   0.001
ATOM      26  O4    THY      2     -3.068   2.569  -0.000
ATOM      27  C5    THY      2     -4.514   0.677   0.000
ATOM      28  C7    THY      2     -5.751   1.523  -0.000
ATOM      29  C6    THY      2     -4.528  -0.678   0.000
ATOM      30  H6    THY      2     -5.459  -1.240   0.000
ATOM      31  H71   THY      2     -5.766   2.173   0.879
ATOM      32  H72   THY      2     -5.765   2.173  -0.879
ATOM      33  H73   THY      2     -6.651   0.903  -0.001
ATOM      34  H1'2  THY      2     -4.042  -3.243  -0.895
ATOM      35  H1'3  THY      2     -4.044  -3.244   0.894
ENDMDL
```

Supplementary Material for Organic & Biomolecular Chemistry  
This journal is (c) The Royal Society of Chemistry 2007

```
TITLE T-FoU(conformation 2) 1-methyl-thymine:1-methyl-5-formyl-uracil
REMARK 6-311G(d,p)/MP2-BSSE Optimized Geometry
REMARK Delta E = -10.1 kcal/mol
REMARK H-bonds (T > FoU) = O4-H3=1.92A,H3-O2=1.97A
MODEL
16
ATOM 1 C1' FOU 1 2.875 -3.063 0.003
ATOM 2 H1'1 FOU 1 1.845 -3.412 -0.004
ATOM 3 N1 FOU 1 2.848 -1.600 0.001
ATOM 4 C6 FOU 1 4.013 -0.896 0.001
ATOM 5 H6 FOU 1 4.931 -1.479 0.002
ATOM 6 C5 FOU 1 4.072 0.463 0.000
ATOM 7 C7 FOU 1 5.388 1.139 0.001
ATOM 8 O8 FOU 1 6.451 0.542 0.002
ATOM 9 H7 FOU 1 5.338 2.241 -0.000
ATOM 10 C4 FOU 1 2.830 1.235 -0.001
ATOM 11 O4 FOU 1 2.746 2.450 -0.002
ATOM 12 N3 FOU 1 1.681 0.424 -0.002
ATOM 13 H3 FOU 1 0.773 0.902 -0.002
ATOM 14 C2 FOU 1 1.605 -0.948 -0.000
ATOM 15 O2 FOU 1 0.552 -1.568 -0.000
ATOM 16 H1'2 FOU 1 3.380 -3.424 0.901
ATOM 17 H1'3 FOU 1 3.392 -3.426 -0.888
TER
ATOM 18 C1' THY 2 -5.817 -1.213 -0.000
ATOM 19 H1'1 THY 2 -5.589 -2.277 -0.019
ATOM 20 N1 THY 2 -4.547 -0.492 -0.003
ATOM 21 C2 THY 2 -3.364 -1.230 -0.001
ATOM 22 O2 THY 2 -3.327 -2.447 -0.000
ATOM 23 N3 THY 2 -2.224 -0.439 -0.001
ATOM 24 H3 THY 2 -1.338 -0.949 -0.000
ATOM 25 C4 THY 2 -2.135 0.948 0.000
ATOM 26 O4 THY 2 -1.048 1.523 0.002
ATOM 27 C5 THY 2 -3.419 1.640 0.000
ATOM 28 C7 THY 2 -3.417 3.138 0.001
ATOM 29 C6 THY 2 -4.547 0.885 -0.001
ATOM 30 H6 THY 2 -5.534 1.339 -0.001
ATOM 31 H71 THY 2 -2.889 3.520 -0.877
ATOM 32 H72 THY 2 -4.437 3.531 0.001
ATOM 33 H73 THY 2 -2.890 3.519 0.881
ATOM 34 H1'2 THY 2 -6.401 -0.948 -0.885
ATOM 35 H1'3 THY 2 -6.384 -0.976 0.904
ENDMDL
```



Supplementary Material for Organic & Biomolecular Chemistry  
This journal is (c) The Royal Society of Chemistry 2007

```
TITLE      T(1):5HodU   1-methyl-5-hydroxy-uracil:T1 base pair
REMARK     6-311G(d,p)/MP2-BSSE Optimized Geometry
REMARK     Delta E = -10.2 kcal/mol
REMARK     H-Bonds (T->U) = H3-O4=1.98; O2-H3=1.92
MODEL
ATOM       1  C1'   HOU      1      5.534   1.203   0.000
ATOM       2  H1'1  HOU      1      5.302   2.266   0.000
ATOM       3  N1    HOU      1      4.269   0.477   0.000
ATOM       4  C6    HOU      1      4.298  -0.911   0.000
ATOM       5  H6    HOU      1      5.279  -1.372   0.000
ATOM       6  C5    HOU      1      3.158  -1.644   0.000
ATOM       7  O5    HOU      1      3.134  -2.996   0.000
ATOM       8  HO5   HOU      1      2.188  -3.211   0.000
ATOM       9  C4    HOU      1      1.871  -0.962  -0.000
ATOM      10  O4    HOU      1      0.815  -1.603  -0.000
ATOM      11  N3    HOU      1      1.942   0.408  -0.000
ATOM      12  H3    HOU      1      1.049   0.914  -0.000
ATOM      13  C2    HOU      1      3.090   1.206   0.000
ATOM      14  O2    HOU      1      3.034   2.422  -0.000
ATOM      15  H1'2  HOU      1      6.111   0.953  -0.894
ATOM      16  H1'3  HOU      1      6.111   0.953   0.894
TER
ATOM      17  C1'   THY      2     -3.091   3.025   0.000
ATOM      18  H1'1  THY      2     -2.058   3.367  -0.002
ATOM      19  N1    THY      2     -3.074   1.565  -0.000
ATOM      20  C2    THY      2     -1.853   0.910   0.000
ATOM      21  O2    THY      2     -0.781   1.506   0.000
ATOM      22  N3    THY      2     -1.950  -0.464   0.000
ATOM      23  H3    THY      2     -1.053  -0.959   0.000
ATOM      24  C4    THY      2     -3.108  -1.254  -0.000
ATOM      25  O4    THY      2     -3.047  -2.473   0.000
ATOM      26  C5    THY      2     -4.352  -0.482  -0.000
ATOM      27  C7    THY      2     -5.647  -1.235  -0.000
ATOM      28  C6    THY      2     -4.268   0.872  -0.000
ATOM      29  H6    THY      2     -5.156   1.499  -0.000
ATOM      30  H71   THY      2     -5.709  -1.883  -0.879
ATOM      31  H72   THY      2     -5.709  -1.883   0.879
ATOM      32  H73   THY      2     -6.500  -0.551  -0.000
ATOM      33  H1'2  THY      2     -3.597   3.395   0.896
ATOM      34  H1'3  THY      2     -3.601   3.395  -0.893
ENDMDL
```

Supplementary Material for Organic & Biomolecular Chemistry  
This journal is (c) The Royal Society of Chemistry 2007

```
TITLE      T(2):5HodU   1-methyl-5-hydroxy-uracil:T2 base pair
REMARK     6-311G(d,p)/MP2-BSSE Optimized Geometry
REMARK     Delta E = -10.9 kcal/mol
REMARK     H-Bonds (T2->5HOU) H3-O2=1.94; O4-H3=1.91
MODEL
18
ATOM       1  C1'   HOU      1      -3.185  -2.997   0.001
ATOM       2  H1'1  HOU      1      -2.163  -3.369   0.000
ATOM       3  N1    HOU      1      -3.128  -1.539   0.000
ATOM       4  C6    HOU      1      -4.322  -0.826   0.001
ATOM       5  H6    HOU      1      -5.233  -1.413   0.001
ATOM       6  C5    HOU      1      -4.332   0.528   0.001
ATOM       7  O5    HOU      1      -5.460   1.273   0.001
ATOM       8  HO5   HOU      1      -5.129   2.186   0.001
ATOM       9  C4    HOU      1      -3.069   1.265   0.000
ATOM      10  O4    HOU      1      -3.045   2.491  -0.001
ATOM      11  N3    HOU      1      -1.944   0.463  -0.000
ATOM      12  H3    HOU      1      -1.027   0.926  -0.001
ATOM      13  C2    HOU      1      -1.895  -0.924  -0.000
ATOM      14  O2    HOU      1      -0.832  -1.539  -0.001
ATOM      15  H1'2  HOU      1      -3.705  -3.351   0.895
ATOM      16  H1'3  HOU      1      -3.706  -3.351  -0.893
TER
ATOM      17  C1'   THY      2       5.487  -1.290   0.001
ATOM      18  H1'1  THY      2       5.235  -2.349  -0.007
ATOM      19  N1    THY      2       4.233  -0.542  -0.001
ATOM      20  C2    THY      2       3.033  -1.256  -0.001
ATOM      21  O2    THY      2       2.973  -2.471   0.000
ATOM      22  N3    THY      2       1.910  -0.441  -0.001
ATOM      23  H3    THY      2       1.011  -0.933  -0.001
ATOM      24  C4    THY      2       1.853   0.946  -0.000
ATOM      25  O4    THY      2       0.779   1.547   0.000
ATOM      26  C5    THY      2       3.150   1.612  -0.000
ATOM      27  C7    THY      2       3.179   3.110   0.000
ATOM      28  C6    THY      2       4.262   0.834  -0.000
ATOM      29  H6    THY      2       5.259   1.267  -0.000
ATOM      30  H71   THY      2       2.660   3.502  -0.879
ATOM      31  H72   THY      2       2.660   3.501   0.880
ATOM      32  H73   THY      2       4.208   3.481   0.001
ATOM      33  H1'2  THY      2       6.064  -1.058   0.899
ATOM      34  H1'3  THY      2       6.072  -1.047  -0.889
ENDMDL
```

Supplementary Material for Organic & Biomolecular Chemistry  
This journal is (c) The Royal Society of Chemistry 2007

```
TITLE      T(1):U 1-methyl-uracil:1-methyl-thymine (conformation 1)
REMARK    6-311G(d,p) MP2-BSSE Optimized Geometry
REMARK    Delta E = -9.9 kcal/mol
REMARK    H-Bonds (T1->U):  H3-O4=1.96; O2-H3=1.94
MODEL
ATOM      1 C1'  URA      1      -5.756   0.728   0.000
ATOM      2 H1'1 URA      1      -5.564   1.799  -0.004
ATOM      3 N1   URA      1      -4.462   0.051  -0.000
ATOM      4 C6   URA      1      -4.408  -1.320  -0.000
ATOM      5 H6   URA      1      -5.375  -1.815  -0.000
ATOM      6 C5   URA      1      -3.246  -2.017  -0.000
ATOM      7 H5   URA      1      -3.232  -3.098  -0.000
ATOM      8 C4   URA      1      -1.983  -1.297  -0.000
ATOM      9 O4   URA      1      -0.873  -1.819  -0.000
ATOM     10 N3   URA      1      -2.132   0.090  -0.000
ATOM     11 H3   URA      1      -1.265   0.636  -0.000
ATOM     12 C2   URA      1      -3.300   0.834  -0.000
ATOM     13 O2   URA      1      -3.318   2.050   0.000
ATOM     14 H1'2 URA      1      -6.321   0.461   0.897
ATOM     15 H1'3 URA      1      -6.325   0.455  -0.892
TER
ATOM     16 C1'  THY      2       2.753   3.014   0.000
ATOM     17 H1'1 THY      2       1.702   3.295   0.002
ATOM     18 N1   THY      2       2.821   1.556   0.000
ATOM     19 C2   THY      2       1.638   0.831   0.000
ATOM     20 O2   THY      2       0.535   1.366   0.000
ATOM     21 N3   THY      2       1.813  -0.536   0.000
ATOM     22 H3   THY      2       0.945  -1.080   0.000
ATOM     23 C4   THY      2       3.015  -1.257   0.000
ATOM     24 O4   THY      2       3.027  -2.477  -0.000
ATOM     25 C5   THY      2       4.213  -0.414   0.000
ATOM     26 C7   THY      2       5.548  -1.093   0.000
ATOM     27 C6   THY      2       4.052   0.932   0.000
ATOM     28 H6   THY      2       4.903   1.609   0.000
ATOM     29 H71  THY      2       5.648  -1.736   0.879
ATOM     30 H72  THY      2       5.647  -1.736  -0.879
ATOM     31 H73  THY      2       6.361  -0.361  -0.000
ATOM     32 H1'2 THY      2       3.237   3.413  -0.895
ATOM     33 H1'3 THY      2       3.240   3.413   0.894
ENDMDL
```

Supplementary Material for Organic & Biomolecular Chemistry  
This journal is (c) The Royal Society of Chemistry 2007

```
TITLE      T(2):U      (1-me-thymine:1-methyl-uracil)
REMARK    6-311G(d,p) MP2-BSSE Optimized Geometry
REMARK    Delta E = -9.8 kcal/mol
REMARK    H-Bonds (T->U) = O4-H3=1.95A; H3-O2=1.95A
MODEL
ATOM      1  C1'  URU      1      0.259  -2.149   0.105  1.00  0.00
ATOM      2 1H1'  URU      1     -0.622  -2.613  -0.334  1.00  0.00
ATOM      3  N1   URU      1      0.079  -0.702   0.032  1.00  0.00
ATOM      4  C6   URU      1      1.056   0.134   0.521  1.00  0.00
ATOM      5  6H   URU      1      1.920  -0.373   0.941  1.00  0.00
ATOM      6  C5   URU      1      0.958   1.484   0.487  1.00  0.00
ATOM      7  5H   URU      1      1.744   2.115   0.880  1.00  0.00
ATOM      8  C4   URU      1     -0.226   2.111  -0.090  1.00  0.00
ATOM      9  O4   URU      1     -0.430   3.309  -0.177  1.00  0.00
ATOM     10  N3   URU      1     -1.164   1.174  -0.561  1.00  0.00
ATOM     11  3H   URU      1     -2.023   1.548  -0.978  1.00  0.00
ATOM     12  C2   URU      1     -1.088  -0.199  -0.538  1.00  0.00
ATOM     13  O2   URU      1     -1.968  -0.929  -0.978  1.00  0.00
ATOM     14 2H1'  URU      1      0.358  -2.463   1.147  1.00  0.00
ATOM     15 3H1'  URU      1      1.148  -2.447  -0.457  1.00  0.00
TER
ATOM      1  C1'  THY      2     -7.636  -1.399  -3.768  1.00  0.00
ATOM      2  N1   THY      2     -6.597  -0.515  -3.248  1.00  0.00
ATOM      3  C2   THY      2     -5.454  -1.087  -2.692  1.00  0.00
ATOM      4  O2   THY      2     -5.271  -2.288  -2.616  1.00  0.00
ATOM      5  N3   THY      2     -4.540  -0.151  -2.232  1.00  0.00
ATOM      6  3H   THY      2     -3.686  -0.537  -1.817  1.00  0.00
ATOM      7  C4   THY      2     -4.635   1.235  -2.262  1.00  0.00
ATOM      8  O4   THY      2     -3.742   1.951  -1.814  1.00  0.00
ATOM      9  C5   THY      2     -5.863   1.748  -2.859  1.00  0.00
ATOM     10  C7   THY      2     -6.049   3.234  -2.932  1.00  0.00
ATOM     11 1H7   THY      2     -5.240   3.691  -3.508  1.00  0.00
ATOM     12 2H7   THY      2     -7.005   3.486  -3.399  1.00  0.00
ATOM     13 3H7   THY      2     -6.016   3.672  -1.931  1.00  0.00
ATOM     14  Q7   THY      2     -6.087   3.616  -2.946  1.00  0.00
ATOM     15  C6   THY      2     -6.771   0.850  -3.316  1.00  0.00
ATOM     16  6H   THY      2     -7.705   1.167  -3.771  1.00  0.00
ATOM     17 1H1'  THY      2     -7.295  -2.423  -3.623  1.00  0.00
ATOM     18 2H1'  THY      2     -7.793  -1.212  -4.833  1.00  0.00
ATOM     19 3H1'  THY      2     -8.571  -1.246  -3.222  1.00  0.00
TER
ENDMDL
```
